# Supplementary material
Source: MDPI journal article supplement (https://www.mdpi.com/2313-0105/9/5/260)
Supplement: s1 [file s1]

# Modification of Single-walled carbon nanotube networks anodes for application in aqueous lithium-ion batteries

Yelyzaveta Rublova<sup>1</sup>, Raimonds Meijs<sup>1</sup>, Vitalijs Lazarenko<sup>1,3</sup>, Jana Andzane<sup>1</sup>, Janis Svirksts<sup>2</sup>, Donats Ertš<sup>1,2\*</sup>

<sup>1</sup>Institute of Chemical Physics, <sup>2</sup>Faculty of Chemistry University of Latvia, Raina Blv. 19, Riga, Latvia, LV-1586

<sup>3</sup>NanoRay, Instituta str. 1, Ulbroka, Stopinu parish, Latvia, LV-2130

\*corresponding author, email: donats.erts@lu.lv

## Supplementary information

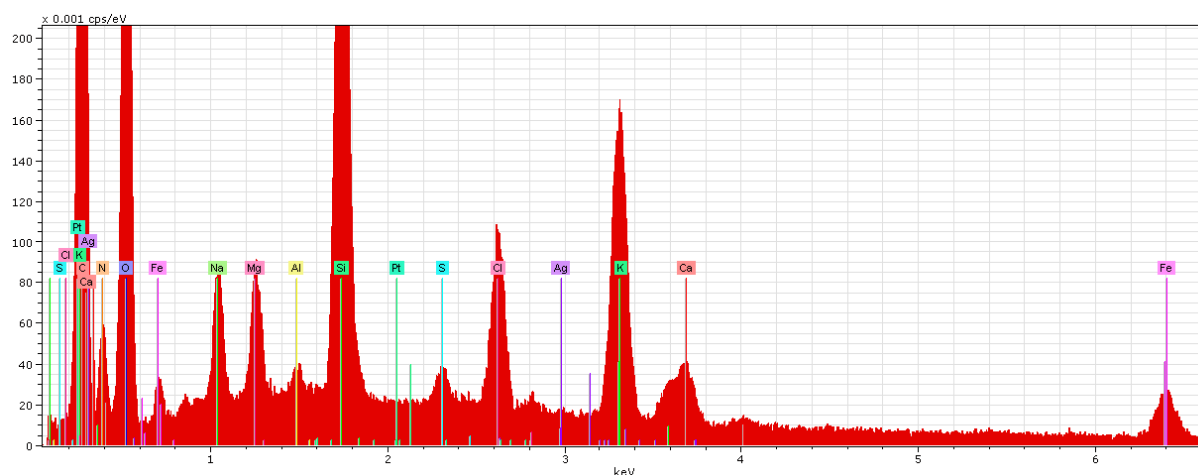

Supplementary Figure S1. EDX spectra of the untreated SWCNT (u-SWCNT) sample before cycling.

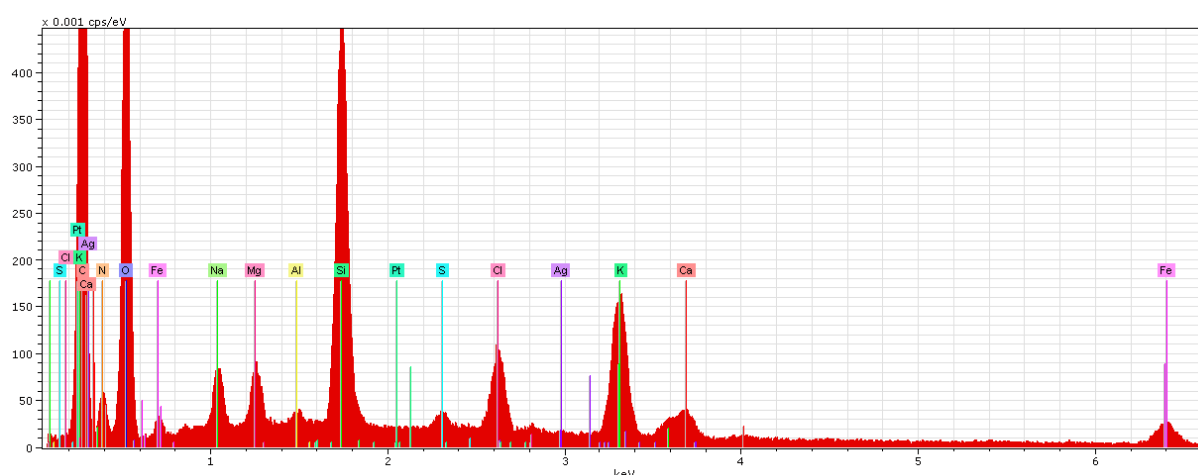

Supplementary Figure S2. EDX spectra of the untreated SWCNT (u-SWCNT) sample after 100 cycles.

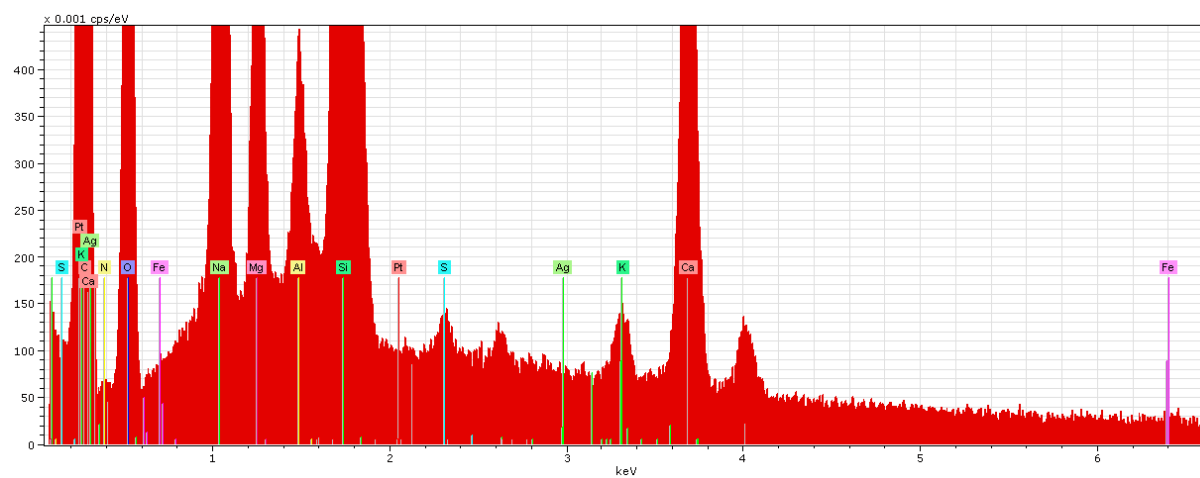

Supplementary Figure S3. EDX spectra of the annealed SWCNT (a-SWCNT) sample before cycling.

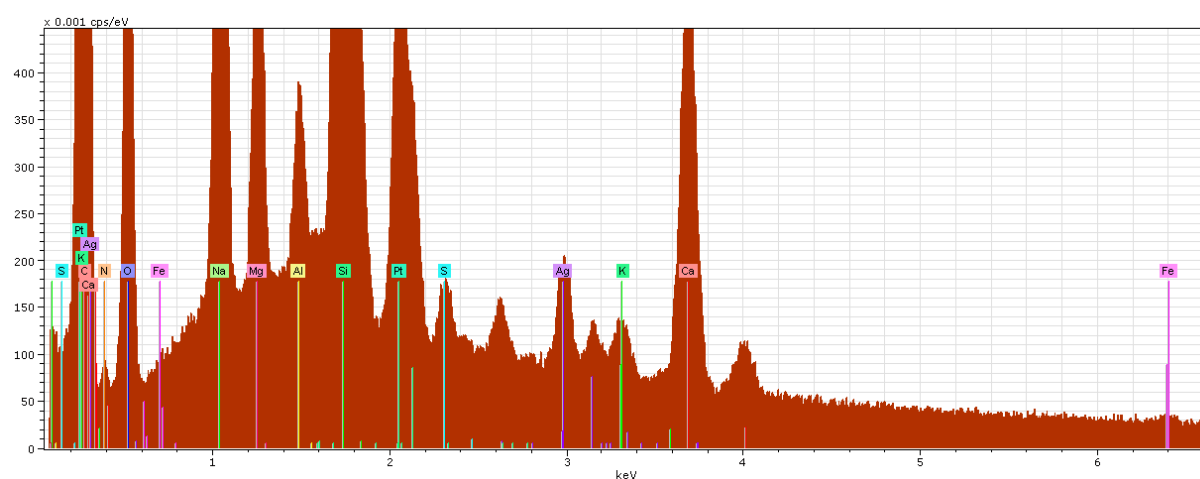

Supplementary Figure S4. EDX spectra of the annealed SWCNT (a-SWCNT) sample after 100 cycles.

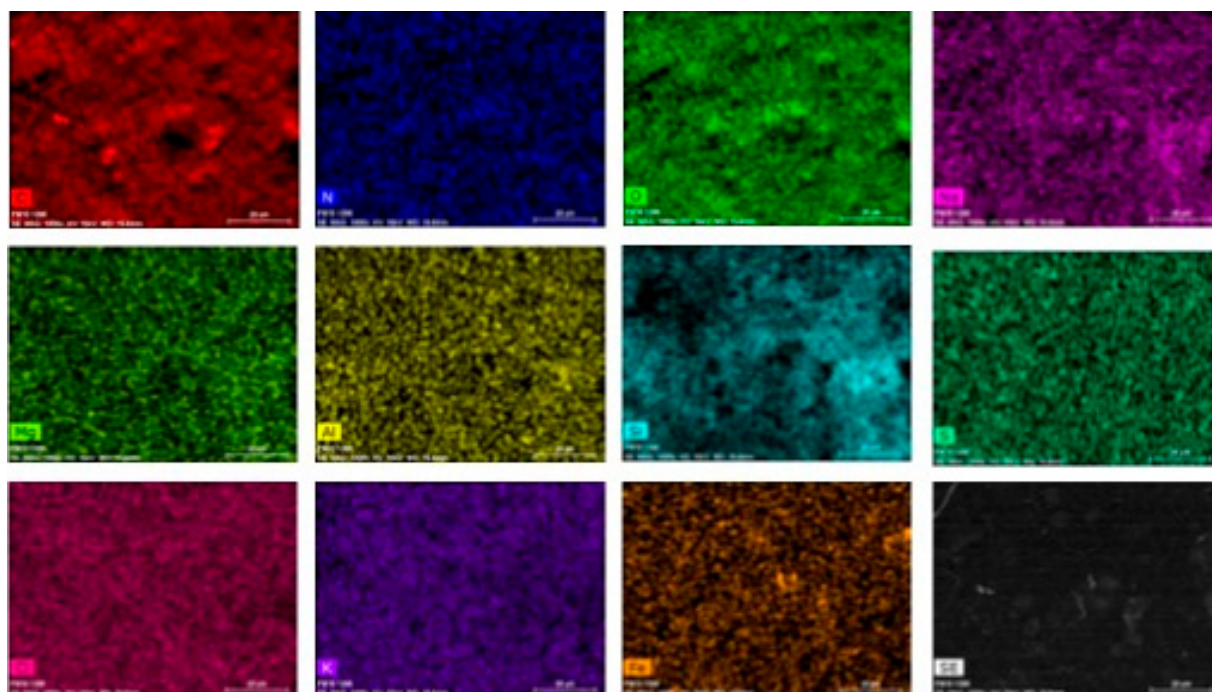

Supplementary Figure S5. EDX mapping spectra of the untreated SWCNT (u-SWCNT) sample before cycling.

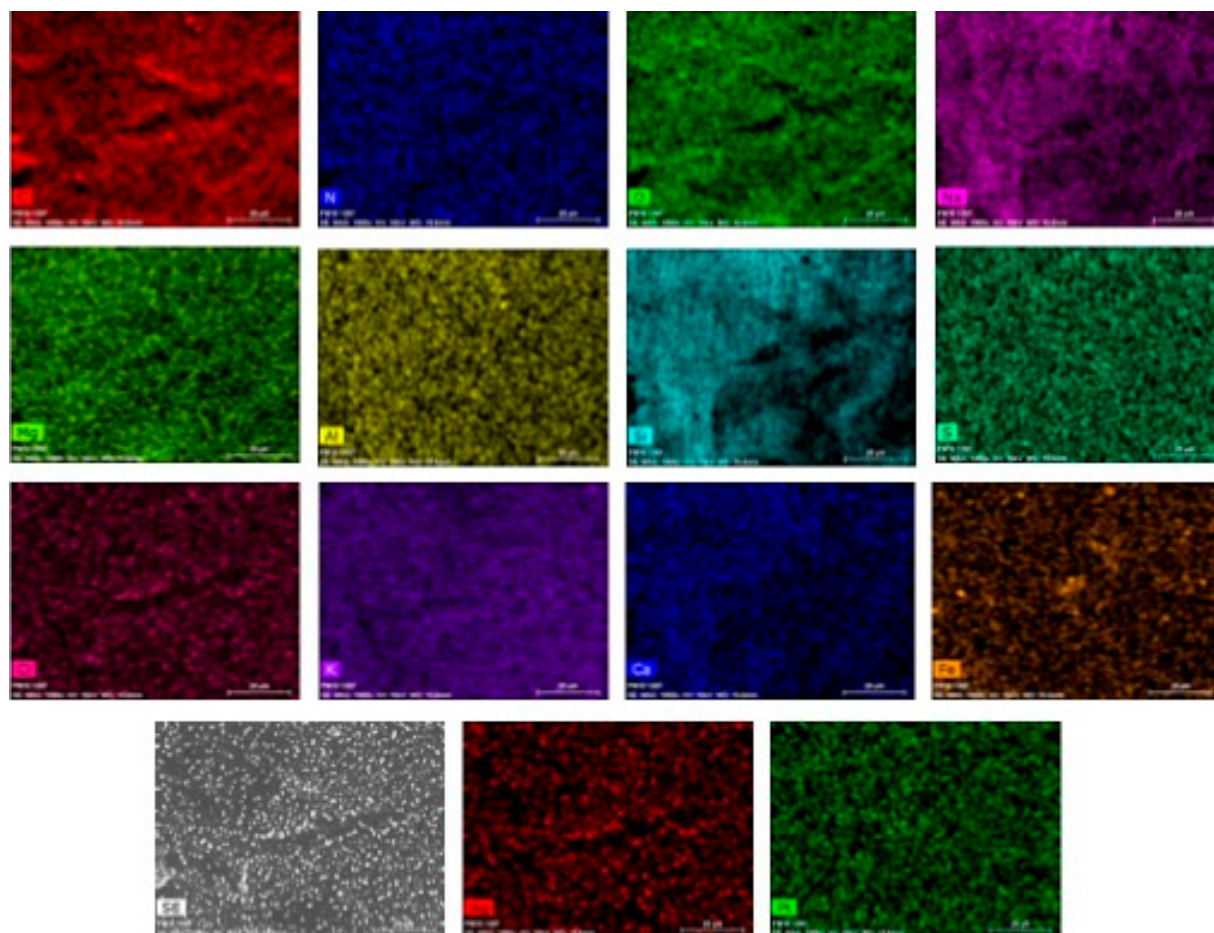

Supplementary Figure S6. EDX mapping spectra of the untreated SWCNT (u-SWCNT) sample after 100 cycles.

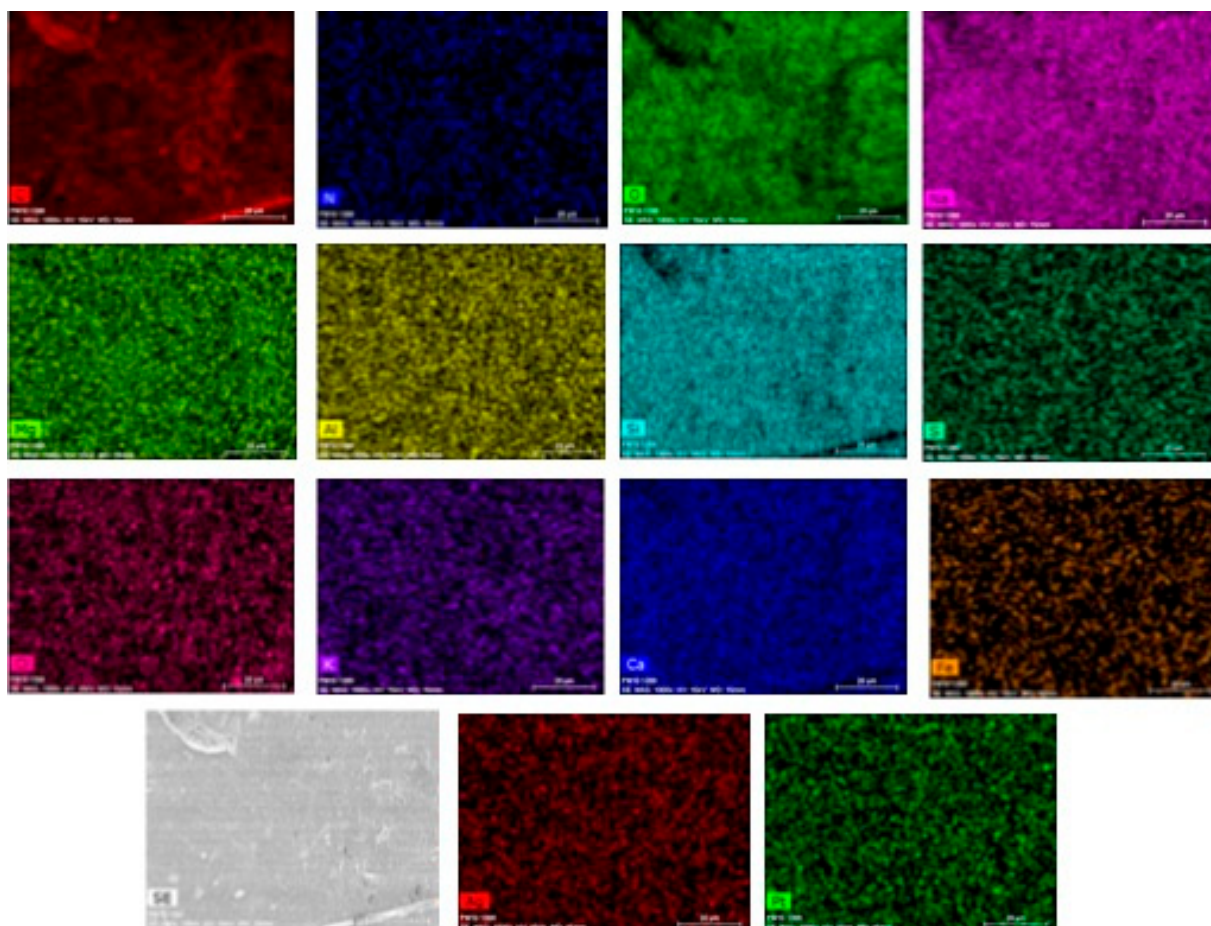

Supplementary Figure S7. EDX mapping spectra of the annealed SWCNT (a-SWCNT) sample before cycling.

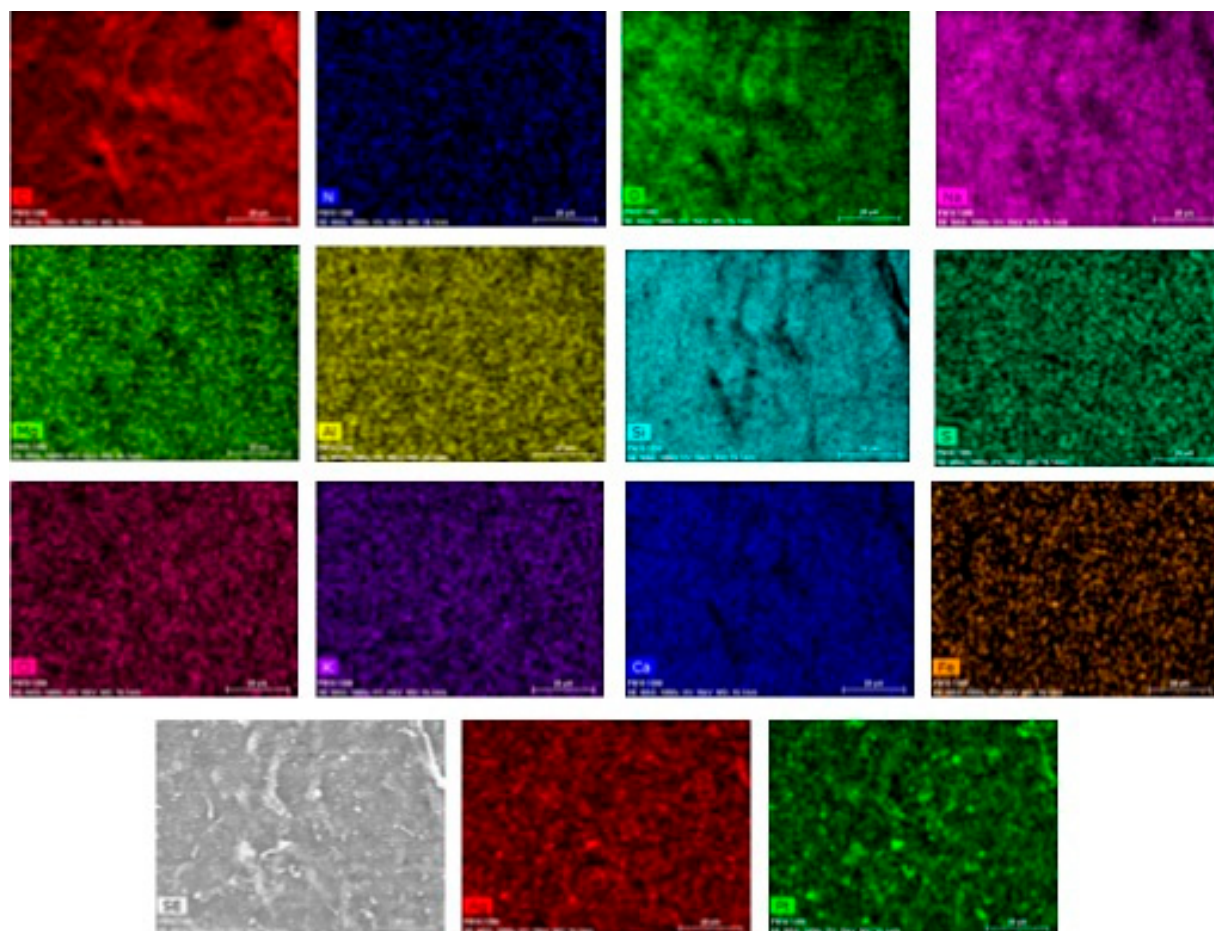

Supplementary Figure S8. EDX mapping spectra of the annealed SWCNT (a-SWCNT) sample after 100 cycles.
